# Supplementary material for: Associations of Adverse Clinical Course and Ingested Substances among Patients with Deliberate Drug Poisoning: A Cohort Study from an Intensive Care Unit in Japan
Source: PubMed Central journal article supplement (PMC4999209; doi:10.1371/journal.pone.0161996), 2016-08-25
Supplement: pone.0161996.s001.pdf [file pone.0161996.s001.pdf]

S1 Table. Risk factors for prolonged length of stay using logistic regression models.

| Characteristic                                                          | Odds ratio (95% confidence interval) |                      |                      |                      |                      |
|-------------------------------------------------------------------------|--------------------------------------|----------------------|----------------------|----------------------|----------------------|
|                                                                         | Model 1 <sup>a</sup>                 | Model 2 <sup>b</sup> | Model 3 <sup>c</sup> | Model 4 <sup>d</sup> | Model 5 <sup>e</sup> |
| Sedative-hypnotics (ref = only benzodiazepine receptor agonists/others) |                                      |                      |                      |                      |                      |
| Barbiturates/non-barbiturates                                           | 2.36 (1.36, 4.04)*                   | 2.85 (1.60, 5.07)*   | 2.74 (1.50, 5.02)*   | 3.02 (1.62, 5.64)*   | 2.97 (1.60, 5.55)*   |
| No sedative-hypnotics                                                   | 0.89 (0.35, 1.95)                    | 1.03 (0.39, 2.38)    | 1.15 (0.43, 2.73)    | 1.07 (0.38, 2.72)    | 1.03 (0.36, 2.62)    |
| Antidepressants (ref = only new-generation antidepressants/others)      |                                      |                      |                      |                      |                      |
| Tricyclic antidepressants                                               | 1.18 (0.43, 2.99)                    | 1.06 (0.38, 2.73)    | 0.96 (0.33, 2.59)    | 0.83 (0.27, 2.36)    | 0.85 (0.27, 2.42)    |
| No antidepressants                                                      | 1.36 (0.75, 2.63)                    | 1.09 (0.58, 2.14)    | 1.26 (0.66, 2.54)    | 1.18 (0.58, 2.52)    | 1.18 (0.58, 2.53)    |
| Antipsychotics (ref = only second-generation antipsychotics)            |                                      |                      |                      |                      |                      |
| First-generation antipsychotics                                         | 1.04 (0.44, 2.58)                    | 0.90 (0.37, 2.26)    | 0.83 (0.34, 2.13)    | 0.78 (0.30, 2.08)    | 0.78 (0.30, 2.08)    |
| No antipsychotics                                                       | 1.06 (0.52, 2.40)                    | 0.82 (0.39, 1.88)    | 0.99 (0.46, 2.36)    | 0.96 (0.42, 2.41)    | 0.98 (0.43, 2.46)    |
| Other classes (ref = without each drug class)                           |                                      |                      |                      |                      |                      |
| Mood stabilizers                                                        | 0.69 (0.31, 1.37)                    | 0.89 (0.39, 1.80)    | 0.71 (0.30, 1.52)    | 0.76 (0.31, 1.72)    | 0.75 (0.30, 1.69)    |
| Antiparkinson drugs                                                     | 1.52 (0.70, 3.00)                    | 1.64 (0.74, 3.35)    | 1.33 (0.58, 2.82)    | 1.77 (0.70, 4.18)    | 1.76 (0.70, 4.17)    |
| Pain killers                                                            | 0.65 (0.31, 1.26)                    | 0.83 (0.38, 1.64)    | 1.01 (0.45, 2.06)    | 1.27 (0.53, 2.81)    | 1.27 (0.54, 2.83)    |
| Antiallergy drugs                                                       | 1.75 (0.58, 4.35)                    | 2.26 (0.71, 5.99)    | 2.33 (0.71, 6.42)    | 2.72 (0.79, 8.06)    | 2.67 (0.78, 7.85)    |
| Cardiovascular drugs                                                    | 1.68 (0.38, 5.20)                    | 1.48 (0.33, 4.76)    | 1.23 (0.27, 4.08)    | 1.04 (0.21, 3.95)    | 0.97 (0.19, 3.74)    |
| Drugs affecting the gut                                                 | 0.72 (0.27, 1.60)                    | 0.65 (0.23, 1.51)    | 0.60 (0.21, 1.42)    | 0.60 (0.20, 1.53)    | 0.59 (0.20, 1.49)    |
| Other                                                                   | 0.49 (0.20, 1.04)                    | 0.51 (0.20, 1.09)    | 0.50 (0.20, 1.10)    | 0.57 (0.22, 1.32)    | 0.59 (0.22, 1.34)    |
| Major diagnosis (ref = adjustment disorders)                            |                                      |                      |                      |                      |                      |
| Bipolar disorders                                                       | 0.96 (0.26, 2.94)                    | 1.05 (0.27, 3.34)    | 1.24 (0.32, 4.03)    | 1.42 (0.34, 4.98)    | 1.37 (0.33, 4.83)    |
| Major depressive disorders                                              | 2.11 (1.02, 4.63)*                   | 1.61 (0.74, 3.69)    | 1.72 (0.77, 4.05)    | 1.86 (0.79, 4.60)    | 1.82 (0.77, 4.51)    |
| Schizophrenia                                                           | 2.64 (1.10, 6.40)*                   | 2.61 (1.05, 6.57)*   | 3.27 (1.28, 8.51)*   | 2.76 (0.99, 7.87)    | 2.65 (0.95, 7.54)    |
| Other                                                                   | 1.20 (0.56, 2.71)                    | 1.42 (0.64, 3.28)    | 0.78 (0.30, 2.06)    | 0.73 (0.27, 1.99)    | 0.73 (0.27, 1.99)    |
| Other diagnoses (ref = without each diagnosis)                          |                                      |                      |                      |                      |                      |
| Borderline personality disorders                                        | 0.81 (0.41, 1.48)                    | 1.55 (0.75, 3.09)    | 2.69 (1.12, 6.21)*   | 2.85 (1.12, 7.09)*   | 2.87 (1.13, 7.14)*   |
| Other personality disorders                                             | 3.66 (1.47, 8.33)*                   | 3.06 (1.18, 7.28)*   | 5.43 (1.89, 14.95)*  | 6.75 (2.24, 19.73)*  | 6.50 (2.15, 19.12)*  |
| Anxiety disorders                                                       | 0.48 (0.11, 1.34)                    | 0.66 (0.15, 1.94)    | 1.12 (0.24, 3.84)    | 1.18 (0.25, 4.17)    | 1.18 (0.25, 4.21)    |
| Substance use disorders                                                 | 1.36 (0.21, 5.08)                    | 1.75 (0.26, 6.83)    | 2.46 (0.35, 10.72)   | 1.76 (0.23, 8.44)    | 1.63 (0.21, 7.91)    |
| Alcohol use disorders                                                   | 1.62 (0.25, 6.19)                    | 1.15 (0.17, 4.83)    | 1.56 (0.21, 7.14)    | 1.31 (0.16, 6.77)    | 1.49 (0.17, 8.07)    |

<sup>a</sup> Unadjusted.<sup>b</sup> Adjusted for sex and age.<sup>c</sup> Adjusted for sex, age, and psychiatric diagnoses.<sup>d</sup> Adjusted for sex, age, psychiatric diagnoses, and drug classes ingested.<sup>e</sup> Adjusted for sex, age, psychiatric diagnoses, drug classes ingested, and alcohol intake.

ref = reference group.

\*  $p < 0.05$ .
