# Supplementary material for: Associations of Adverse Clinical Course and Ingested Substances among Patients with Deliberate Drug Poisoning: A Cohort Study from an Intensive Care Unit in Japan
Source: PubMed Central journal article supplement (PMC4999209; doi:10.1371/journal.pone.0161996), 2016-08-25
Supplement: pone.0161996.s002.pdf [file pone.0161996.s002.pdf]

S2 Table. Risk factors for aspiration pneumonitis using logistic regression models.

| Characteristic                                                          | Odds ratio (95% confidence interval) |                      |                      |                      |                      |
|-------------------------------------------------------------------------|--------------------------------------|----------------------|----------------------|----------------------|----------------------|
|                                                                         | Model 1 <sup>a</sup>                 | Model 2 <sup>b</sup> | Model 3 <sup>c</sup> | Model 4 <sup>d</sup> | Model 5 <sup>e</sup> |
| Sedative-hypnotics (ref = only benzodiazepine receptor agonists/others) |                                      |                      |                      |                      |                      |
| Barbiturates/non-barbiturates                                           | 3.73 (2.24, 6.26)*                   | 3.86 (2.30, 6.52)*   | 3.80 (2.21, 6.57)*   | 3.86 (2.20, 6.84)*   | 3.83 (2.18, 6.79)*   |
| No sedative-hypnotics                                                   | 0.26 (0.04, 0.86)*                   | 0.26 (0.04, 0.89)*   | 0.25 (0.04, 0.86)*   | 0.36 (0.05, 1.34)    | 0.35 (0.05, 1.30)    |
| Antidepressants (ref = only new-generation antidepressants/others)      |                                      |                      |                      |                      |                      |
| Tricyclic antidepressants                                               | 1.84 (0.83, 3.96)                    | 1.74 (0.78, 3.79)    | 1.89 (0.83, 4.21)    | 2.25 (0.93, 5.37)    | 2.25 (0.93, 5.38)    |
| No antidepressants                                                      | 0.86 (0.49, 1.59)                    | 0.82 (0.46, 1.50)    | 0.81 (0.45, 1.53)    | 0.85 (0.44, 1.71)    | 0.85 (0.44, 1.71)    |
| Antipsychotics (ref = only second-generation antipsychotics)            |                                      |                      |                      |                      |                      |
| First-generation antipsychotics                                         | 1.15 (0.53, 2.60)                    | 1.10 (0.51, 2.50)    | 1.08 (0.49, 2.49)    | 1.02 (0.43, 2.52)    | 1.02 (0.43, 2.53)    |
| No antipsychotics                                                       | 0.76 (0.39, 1.62)                    | 0.73 (0.37, 1.55)    | 0.92 (0.45, 2.01)    | 1.10 (0.49, 2.61)    | 1.12 (0.50, 2.66)    |
| Other classes (ref = without each drug class)                           |                                      |                      |                      |                      |                      |
| Mood stabilizers                                                        | 0.85 (0.41, 1.60)                    | 0.89 (0.43, 1.70)    | 0.72 (0.33, 1.43)    | 0.57 (0.24, 1.23)    | 0.56 (0.24, 1.21)    |
| Antiparkinson drugs                                                     | 2.85 (1.50, 5.21)*                   | 2.88 (1.50, 5.29)*   | 2.30 (1.16, 4.36)*   | 2.74 (1.25, 5.90)*   | 2.77 (1.26, 5.96)*   |
| Pain killers                                                            | 0.27 (0.09, 0.63)*                   | 0.28 (0.10, 0.66)*   | 0.30 (0.10, 0.71)*   | 0.59 (0.19, 1.52)    | 0.59 (0.19, 1.53)    |
| Antiallergy drugs                                                       | 0.27 (0.02, 1.29)                    | 0.28 (0.02, 1.38)    | 0.30 (0.02, 1.48)    | 0.28 (0.01, 1.64)    | 0.28 (0.01, 1.61)    |
| Cardiovascular drugs                                                    | 0.46 (0.03, 2.27)                    | 0.42 (0.02, 2.09)    | 0.31 (0.02, 1.67)    | 0.14 (0.01, 0.95)*   | 0.14 (0.01, 0.91)*   |
| Drugs affecting the gut                                                 | 1.13 (0.50, 2.26)                    | 1.15 (0.51, 2.33)    | 1.02 (0.45, 2.10)    | 1.13 (0.45, 2.60)    | 1.10 (0.44, 2.53)    |
| Other                                                                   | 0.25 (0.07, 0.61)*                   | 0.25 (0.08, 0.63)*   | 0.24 (0.07, 0.62)*   | 0.23 (0.06, 0.64)*   | 0.23 (0.06, 0.64)*   |
| Major diagnosis (ref = adjustment disorders)                            |                                      |                      |                      |                      |                      |
| Bipolar disorders                                                       | 2.07 (0.76, 5.40)                    | 2.05 (0.75, 5.44)    | 1.98 (0.72, 5.30)    | 2.13 (0.67, 6.54)    | 2.07 (0.65, 6.39)    |
| Major depressive disorders                                              | 1.52 (0.70, 3.43)                    | 1.39 (0.63, 3.20)    | 1.29 (0.57, 3.00)    | 0.89 (0.37, 2.22)    | 0.87 (0.36, 2.18)    |
| Schizophrenia                                                           | 2.90 (1.23, 6.97)*                   | 2.79 (1.16, 6.80)*   | 2.89 (1.20, 7.10)*   | 1.87 (0.71, 5.00)    | 1.81 (0.68, 4.86)    |
| Other                                                                   | 1.50 (0.72, 3.31)                    | 1.56 (0.74, 3.47)    | 0.91 (0.36, 2.39)    | 0.70 (0.26, 1.98)    | 0.70 (0.25, 1.96)    |
| Other diagnoses (ref = without each diagnosis)                          |                                      |                      |                      |                      |                      |
| Borderline personality disorders                                        | 1.22 (0.67, 2.11)                    | 1.46 (0.78, 2.67)    | 1.98 (0.91, 4.19)    | 1.83 (0.78, 4.19)    | 1.86 (0.79, 4.27)    |
| Other personality disorders                                             | 0.61 (0.10, 2.10)                    | 0.54 (0.08, 1.89)    | 0.86 (0.13, 3.27)    | 0.93 (0.13, 3.91)    | 0.90 (0.13, 3.79)    |
| Anxiety disorders                                                       | 1.01 (0.38, 2.27)                    | 1.14 (0.42, 2.61)    | 1.75 (0.57, 4.81)    | 1.51 (0.45, 4.55)    | 1.54 (0.46, 4.65)    |
| Substance use disorders                                                 | 1.30 (0.20, 4.83)                    | 1.39 (0.21, 5.22)    | 1.66 (0.24, 7.22)    | 0.89 (0.12, 4.46)    | 0.85 (0.11, 4.26)    |
| Alcohol use disorders                                                   | 3.89 (1.03, 12.29)*                  | 3.53 (0.93, 11.31)   | 4.38 (1.09, 15.16)*  | 4.92 (1.05, 20.38)*  | 5.40 (1.13, 23.01)*  |

<sup>a</sup> Unadjusted.<sup>b</sup> Adjusted for sex and age.<sup>c</sup> Adjusted for sex, age, and psychiatric diagnoses.<sup>d</sup> Adjusted for sex, age, psychiatric diagnoses, and drug classes ingested.<sup>e</sup> Adjusted for sex, age, psychiatric diagnoses, drug classes ingested, and alcohol intake.

ref = reference group.

\*  $p < 0.05$ .
