# Supplementary material for: Associations of Adverse Clinical Course and Ingested Substances among Patients with Deliberate Drug Poisoning: A Cohort Study from an Intensive Care Unit in Japan
Source: PubMed Central journal article supplement (PMC4999209; doi:10.1371/journal.pone.0161996), 2016-08-25
Supplement: pone.0161996.s003.pdf [file pone.0161996.s003.pdf]

S3 Table. Risk factors for prolonged length of stay using a quasi-Poisson model.

| Characteristic                                | n   | M   | SD  | Incidence rate ratio<br>(95% confidence interval) |
|-----------------------------------------------|-----|-----|-----|---------------------------------------------------|
| Total                                         | 676 | 2.3 | 2.4 |                                                   |
| Sedative-hypnotics                            |     |     |     |                                                   |
| Only benzodiazepine receptor agonists/others  | 426 | 2.2 | 2.2 | ref                                               |
| Barbiturates/non-barbiturates                 | 155 | 2.7 | 3.0 | 1.21 (1.02, 1.43)*                                |
| No sedative-hypnotics                         | 95  | 2.2 | 2.0 | 0.95 (0.75, 1.19)                                 |
| Antidepressants                               |     |     |     |                                                   |
| Only new-generation antidepressants/others    | 168 | 2.1 | 1.9 | ref                                               |
| Tricyclic antidepressants                     | 72  | 2.3 | 1.0 | 1.03 (0.79, 1.33)                                 |
| No antidepressants                            | 436 | 2.4 | 2.7 | 1.09 (0.91, 1.31)                                 |
| Antipsychotics                                |     |     |     |                                                   |
| Only second-generation antipsychotics         | 92  | 2.0 | 1.0 | ref                                               |
| First-generation antipsychotics               | 148 | 2.5 | 3.5 | 1.18 (0.92, 1.52)                                 |
| No antipsychotics                             | 436 | 2.3 | 2.1 | 1.09 (0.87, 1.37)                                 |
| Other classes (ref = without each drug class) |     |     |     |                                                   |
| Mood stabilizers                              | 117 | 2.1 | 0.9 | 0.91 (0.73, 1.12)                                 |
| Antiparkinson drugs                           | 71  | 2.3 | 1.6 | 1.01 (0.78, 1.29)                                 |
| Pain killers                                  | 135 | 2.4 | 2.4 | 1.21 (1.00, 1.46)*                                |
| Antiallergy drugs                             | 31  | 3.3 | 4.3 | 1.52 (1.12, 2.01)*                                |
| Cardiovascular drugs                          | 19  | 2.2 | 1.3 | 0.84 (0.53, 1.27)                                 |
| Drugs affecting the gut                       | 77  | 2.0 | 1.0 | 0.81 (0.63, 1.03)                                 |
| Other                                         | 120 | 2.1 | 1.1 | 0.91 (0.75, 1.11)                                 |
| Major diagnosis                               |     |     |     |                                                   |
| Adjustment disorders                          | 156 | 2.1 | 1.4 | ref                                               |
| Bipolar disorders                             | 59  | 2.2 | 1.1 | 1.18 (0.87, 1.58)                                 |
| Major depressive disorders                    | 174 | 2.5 | 2.7 | 1.18 (0.95, 1.46)                                 |
| Schizophrenia                                 | 72  | 2.7 | 2.1 | 1.35 (1.03, 1.75)*                                |
| Other                                         | 215 | 2.3 | 3.0 | 1.01 (0.78, 1.30)                                 |
| Other diagnoses                               |     |     |     |                                                   |
| Borderline personality disorders              | 148 | 2.3 | 3.4 | 1.26 (1.00, 1.58)                                 |
| Other personality disorders                   | 29  | 2.9 | 2.4 | 1.37 (0.97, 1.89)                                 |
| Anxiety disorders                             | 56  | 1.9 | 1.0 | 0.97 (0.70, 1.33)                                 |
| Substance use disorders                       | 15  | 3.5 | 5.3 | 1.50 (0.96, 2.24)                                 |
| Alcohol use disorders                         | 13  | 2.4 | 0.8 | 1.00 (0.58, 1.60)                                 |

m = mean; SD = standard deviation; ref = reference group.

\*  $p < 0.05$ .
